# Supplementary material for: Comprehensive analysis of long non-coding RNA expression profiles in hepatitis B virus-related hepatocellular carcinoma
Source: PubMed Central journal article supplement (PMC5173145; doi:10.18632/oncotarget.9880), 2016-06-07
Supplement: oncotarget-07-42422-s001.pdf [file oncotarget-07-42422-s001.pdf]

## Comprehensive analysis of long non-coding RNA expression profiles in hepatitis B virus-related hepatocellular carcinoma

### SUPPLEMENTARY FIGURE AND TABLES

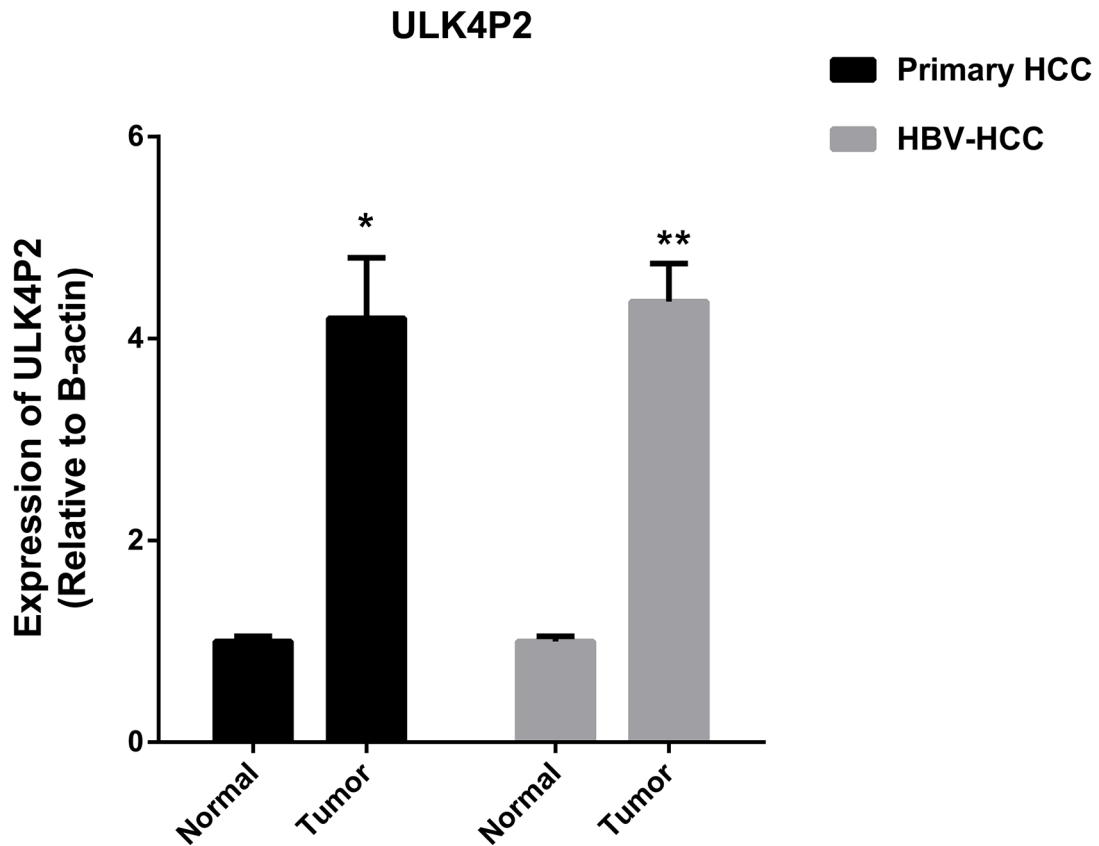

Supplementary Figure S1: Expression of ULK4P2 is up-regulated in both primary HCC and HBV-related HCC tissues. \* $P < 0.05$ ; \*\* $P < 0.01$ .

**Supplementary Table S1: 182 HH-lncRNAs.**

**See Supplementary File 1**

**Supplementary Table S2: GREAT results of the 182 HH-lncRNAs.**

**See Supplementary File 2**

**Supplementary Table S3: Predicted miRNA binding sites in the sequence of BAIAP2-AS1.**

**See Supplementary File 3**

**Supplementary Table S4: PCR primers.**

**See Supplementary File 4**
